# Supplementary material
Source: PubMed Central journal article supplement (PMC6811421)

**Table S1. Dosing Regimens Simulated**

| <b>Piperacillin Amount (mg/kg/dose)</b> | <b>Infusion time (hours)</b> | <b>Dosing Interval (hours)</b> |
|-----------------------------------------|------------------------------|--------------------------------|
| 50                                      | 0.5, 2                       | 4                              |
| 75                                      | 0.5, 2, 3                    | 6                              |
| 75                                      | 0.5, 2                       | 4                              |
| 80                                      | 0.5, 2, 3                    | 6                              |
| 80                                      | 0.5, 2, 3, 4                 | 8                              |
| 90                                      | 0.5, 2, 3                    | 6                              |
| 90                                      | 0.5, 2, 3, 4                 | 8                              |
| 100                                     | 0.5, 2, 3, 4                 | 8                              |
| 100                                     | 0.5, 2                       | 4                              |
| 100                                     | 0.5, 2, 3                    | 6                              |
| 120                                     | 0.5, 2, 3                    | 6                              |
| 130                                     | 0.5, 2, 3, 4                 | 8                              |
| 150                                     | 0.5, 2, 3                    | 6                              |
| 300                                     | Continuous infusion          | 24                             |
| 320                                     | Continuous infusion          | 24                             |
| 350                                     | Continuous infusion          | 24                             |
| 400                                     | Continuous infusion          | 24                             |
| 450                                     | Continuous infusion          | 24                             |
| 480                                     | Continuous infusion          | 24                             |
| 600                                     | Continuous infusion          | 24                             |

**Table S2. Clinical Adverse and Severe Adverse Events**

|                                                   | Adverse events<br>N=89 (%) |           |           | Severe adverse events<br>N=89 (%) |           |           |
|---------------------------------------------------|----------------------------|-----------|-----------|-----------------------------------|-----------|-----------|
|                                                   | GP/GS                      | H-O       | PICU      | GP/GS                             | H-O       | PICU      |
| <b>Drug Mediated</b>                              |                            |           |           |                                   |           |           |
| <i>Infusion site infiltration</i>                 | 2<br>(2%)                  | 1<br>(1%) | -         | -                                 | -         | -         |
| <i>Allergic reaction</i>                          | -                          | -         | 1         | -                                 | 1<br>(1%) | -         |
| <i>Injection site reaction</i>                    | 1<br>(1%)                  | -         | -         | -                                 | -         | -         |
| <b>Gastroenterology</b>                           |                            |           |           |                                   |           |           |
| <i>Intestinal discomfort</i>                      | 3<br>(3%)                  | 5<br>(6%) | 1<br>(1%) | -                                 | -         | -         |
| <b>Cardiology</b>                                 |                            |           |           |                                   |           |           |
| <i>Prolonged QT interval</i>                      | -                          | 1<br>(1%) | -         | -                                 | -         | -         |
| <i>1<sup>st</sup> Degree AV block</i>             | -                          | -         | 1<br>(1%) | -                                 | -         | -         |
| <i>Bradycardia</i>                                | -                          | 1<br>(1%) | 1<br>(1%) | -                                 | -         | 1<br>(1%) |
| <i>Hypotension</i>                                | -                          | -         | 1<br>(1%) | -                                 | -         | -         |
| <b>Infectious Disease</b>                         |                            |           |           |                                   |           |           |
| <i>Cellulitis</i>                                 | -                          | -         | -         | -                                 | -         | 1<br>(1%) |
| <b>Neurologic</b>                                 |                            |           |           |                                   |           |           |
| <i>Delirium</i>                                   | -                          | -         | -         | -                                 | -         | 1<br>(1%) |
| <b>Hematology</b>                                 |                            |           |           |                                   |           |           |
| <i>Thrombosis</i>                                 | -                          | -         | -         | -                                 | -         | 1<br>(1%) |
| <i>Neutropenia requiring<br/>G-CSF</i>            | -                          | -         | -         | -                                 | 1<br>(1%) | 1<br>(1%) |
| <i>Thrombocytopenia<br/>requiring transfusion</i> | -                          | -         | -         | -                                 | 1<br>(1%) | -         |
| <b>Respiratory</b>                                |                            |           |           |                                   |           |           |
| <i>Upper airway<br/>obstruction</i>               | -                          | -         | -         | -                                 | -         | 3<br>(3%) |
| <i>Pleural effusion</i>                           | -                          | -         | 1<br>(1%) | -                                 | -         | -         |
| <i>Respiratory failure</i>                        | -                          | -         | -         | -                                 | -         | 1<br>(1%) |

AV: atrioventricular, G-CSF: Granulocyte-colony stimulating factor, GP/GS: general pediatrics/general surgery, H-O: hemato-oncology, PICU: pediatric intensive care unit

**Table S3. Laboratory Adverse and Severe Adverse Events**

|                                               | Adverse events<br>N=89 (%) |        |        |        | Severe adverse events<br>N=89 (%) |       |     |        |
|-----------------------------------------------|----------------------------|--------|--------|--------|-----------------------------------|-------|-----|--------|
|                                               | Definition                 | GP/GS  | H-O    | PICU   | Definition                        | GP/GS | H-O | PICU   |
| <b>Electrolytes</b>                           |                            |        |        |        |                                   |       |     |        |
| <i>Hyponatremia (mmol/L)</i>                  | 120-124                    | -      | -      | 2 (2%) | < 120                             | -     | -   | -      |
| <i>Hypernatremia (mmol/L)</i>                 | 150-159                    | -      | -      | 3 (3%) | > 159                             | -     | -   | -      |
| <i>Elevated Bicarbonates (mmol/L)</i>         | 34-45                      | -      | -      | 1 (1%) | > 45                              | -     | -   | -      |
| <b>Liver</b>                                  |                            |        |        |        |                                   |       |     |        |
| <i>Elevated AST (IU/L)</i>                    | 200-1000                   | -      | 1 (1%) | -      | > 1000                            | -     | -   | -      |
| <i>Elevated ALT (IU/L)</i>                    | 200-1000                   | -      | 1 (1%) | -      | > 1000                            | -     | -   | -      |
| <i>Elevated GGT (IU/L)</i>                    | 100-125                    | -      | -      | -      | > 125                             | -     | -   | 3 (3%) |
| <b>Hematology</b>                             |                            |        |        |        |                                   |       |     |        |
| <i>Elevated Lactate (mmol/L)</i>              | 5-10                       | -      | -      | 1 (1%) | > 10                              | -     | -   | -      |
| <i>Eosinophilia</i>                           | >0.4*10 <sup>9</sup> /L    | 1 (1%) | -      |        | N/A                               | -     | -   | -      |
| <i>Neutropenia (x 10<sup>9</sup>/L)</i>       | 0.5-1.5                    | -      | -      | 3 (3%) | < 0.5                             | -     | -   | -      |
| <i>Thrombocytopenia (x 10<sup>9</sup>/L)</i>  | 50-100                     | 1 (1%) | -      |        | < 50                              | -     | -   | -      |
| <i>Thrombocytosis (x 10<sup>9</sup>/L)</i>    | 450-1000                   | 6 (7%) | -      | 5 (6%) | > 1000                            | -     | -   | -      |
| <i>Anemia (x 10<sup>9</sup>/L)</i>            | 70-90                      | -      | 2 (2%) | 2 (2%) | < 70                              | -     | -   | -      |
| <i>Leucopenia (x 10<sup>9</sup>/L)</i>        | 0.5-2                      | -      | 5 (6%) |        | < 0.5                             | -     | -   | -      |
| <i>Hyperleukocytosis (x 10<sup>9</sup>/L)</i> | 30-50                      | -      | -      | 1 (1%) | > 50                              | -     | -   | -      |
| <b>Endocrinology</b>                          |                            |        |        |        |                                   |       |     |        |
| <i>Hyperglycemia (mmol/L)</i>                 | 13.9-27.8                  | -      | -      | 2 (2%) | > 27.8                            | -     | -   | -      |

ALT: alanine aminotransferase, AST: aspartate aminotransferase, GGT: gamma-glutamyl transferase, GP/GS: general pediatrics/general surgery, H-O: hemato-oncology, PICU: pediatric intensive care unit

**Table S4. Piperacillin Model Progression**

| Description                                  | Population Model                                                                                                                                                                                                                | OFV  | ΔOFV |
|----------------------------------------------|---------------------------------------------------------------------------------------------------------------------------------------------------------------------------------------------------------------------------------|------|------|
| <b>Univariate Analysis</b>                   |                                                                                                                                                                                                                                 |      |      |
| Base Model                                   | $CL=3.78*(WT/11.4)^{1.48}$ ; $Vc=4.99*(WT/11.4)^{1.31}$<br>$Q=0.27*(WT/11.4)^{1.48}$ ; $Vp=0.52*(WT/11.4)^{1.31}$                                                                                                               | 3226 | .    |
| Hospitalization Unit <sup>1</sup> on CL      | $CL=3.77*(WT/11.4)^{1.42}$ if unit=1<br>$CL=3.77*(WT/11.4)^{1.42}*e^{0.15}$ if unit=2<br>$CL=3.77*(WT/11.4)^{1.42}*e^{-0.19}$ if unit=3<br>$Vc=4.93*(WT/11.4)^{1.35}$ ; $Q=0.21*(WT/11.4)^{1.42}$<br>$Vp=0.47*(WT/11.4)^{1.35}$ | 3222 | -4   |
| Furosemide on CL                             | $CL=3.92*(WT/11.4)^{1.40}*e^{-0.28}$ if furosemide<br>$Vc=4.87*(WT/11.4)^{1.26}$ ; $Q=0.25*(WT/11.4)^{1.40}$<br>$Vp=0.49*(WT/11.4)^{1.26}$                                                                                      | 3216 | -10  |
| Hospitalization Unit <sup>1</sup> on Vc      | $CL=3.53*(WT/11.4)^{1.46}$ if unit=1<br>$CL=3.53*(WT/11.4)^{1.46}*e^{-0.7}$ if unit=2<br>$CL=3.53*(WT/11.4)^{1.46}*e^{0.4}$ if unit=3<br>$Vc=4.00*(WT/11.4)^{1.40}$ ; $Q=0.25*(WT/11.4)^{1.46}$<br>$Vp=0.48*(WT/11.4)^{1.40}$   | 3222 | -4   |
| <b>Multivariate Analysis, Step 1</b>         |                                                                                                                                                                                                                                 |      |      |
| Furosemide on CL and Albumin on Vc           | $CL=3.76*(WT/11.4)^{1.39}*e^{-0.28}$ if furosemide<br>$Vc=4.30*(WT/11.4)^{1.29}*(ALB/29)^{-1.52}$<br>$Q=0.43*(WT/11.4)^{1.39}$ ; $Vp=0.57*(WT/11.4)^{1.29}$                                                                     | 3212 | -4   |
| <b>Backward Elimination, Step 1</b>          |                                                                                                                                                                                                                                 |      |      |
| Albumin on Vc<br>Backward Drop of Furosemide | $CL=3.64*(WT/11.4)^{1.46}$<br>$Vc=4.47*(WT/11.4)^{1.32}*(ALB/29)^{-1.31}$<br>$Q=0.36*(WT/11.4)^{1.46}$ ; $Vp=0.61*(WT/11.4)^{1.32}$                                                                                             | 3223 | +11  |
| Furosemide on CL<br>Backward Drop of Albumin | $CL=3.92*(WT/11.4)^{1.40}*e^{-0.28}$ if furosemide<br>$Vc=4.87*(WT/11.4)^{1.26}$<br>$Q=0.25*(WT/11.4)^{1.40}$ ; $Vp=0.49*(WT/11.4)^{1.26}$                                                                                      | 3216 | +4   |
| <b>Backward Elimination, Step 2</b>          |                                                                                                                                                                                                                                 |      |      |
| Backward Drop of Furosemide                  | $CL=3.78*(WT/11.4)^{1.48}$<br>$Vc=4.99*(WT/11.4)^{1.31}$<br>$Q=0.27*(WT/11.4)^{1.48}$ ; $Vp=0.52*(WT/11.4)^{1.31}$                                                                                                              | 3226 | +10  |
| <b>Final Model</b>                           |                                                                                                                                                                                                                                 |      |      |
| Furosemide on CL                             | $CL=3.92*(WT/11.4)^{1.40}*e^{-0.28}$ if furosemide<br>$Vc=4.87*(WT/11.4)^{1.26}$<br>$Q=0.25*(WT/11.4)^{1.40}$ ; $Vp=0.49*(WT/11.4)^{1.26}$                                                                                      | 3216 | .    |

<sup>1</sup>Hospitalization units: 1=general pediatrics/general surgery, 2=hemato-oncology, 3=pediatric intensive care unit

CL: clearance, OFV: objective function value, Q: intercompartmental clearance, Vc: volume of distribution of the central compartment, Vp: volume of distribution of peripheral compartment

**Figure S1. Prediction-Corrected Visual Predictive Check for Final Piperacillin Model**

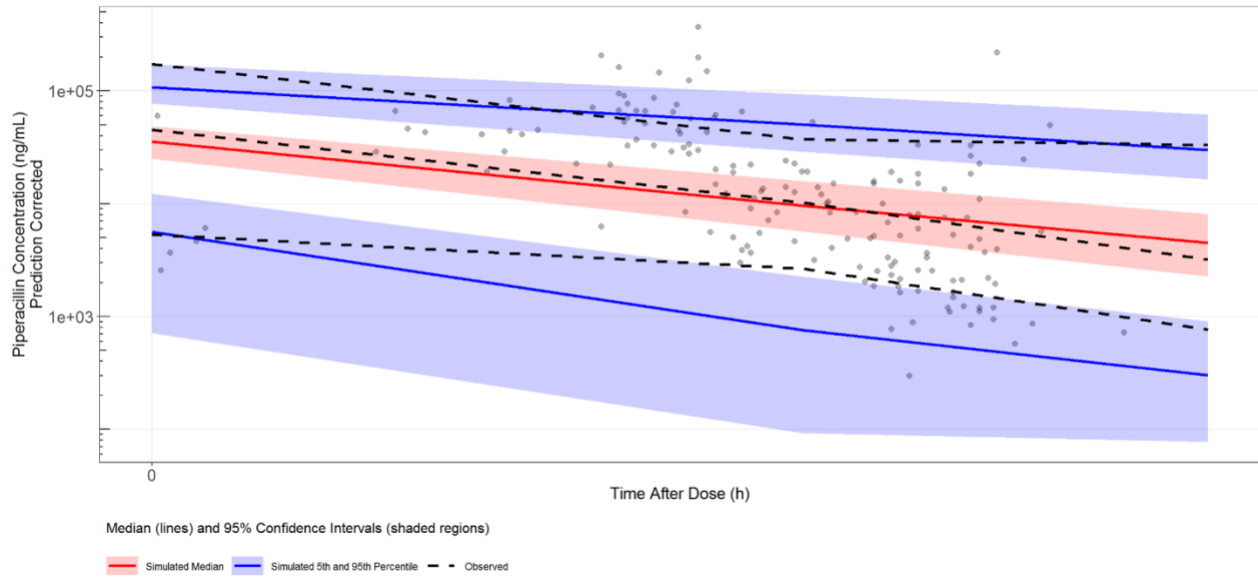

**Table S5. Tazobactam Model Progression**

| Description                          | Population Model                                                                                                                                                                                                                                                              | OFV         | ΔOFV       |
|--------------------------------------|-------------------------------------------------------------------------------------------------------------------------------------------------------------------------------------------------------------------------------------------------------------------------------|-------------|------------|
| <i>Univariate Analysis</i>           |                                                                                                                                                                                                                                                                               |             |            |
| Base Model                           | $CL=3.0.6*(WT/11.4)^{1.31}$ ; $Vc=3.94*(WT/11.4)^{1.07}$<br>$Q=0.21*(WT/11.4)^{1.31}$ ; $Vp=3.74*(WT/11.4)^{1.07}$                                                                                                                                                            | 2544        | .          |
| Sex on CL                            | $CL=3.37*(WT/11.4)^{1.27}*e^{-0.23}$ if female<br>$Vc=3.90*(WT/11.4)^{1.05}$ ; $Q=0.21*(WT/11.4)^{1.27}$<br>$Vp=3.88*(WT/11.4)^{1.05}$                                                                                                                                        | 2539        | 5          |
| Furosemide on CL                     | <b><math>CL=3.15*(WT/11.4)^{1.24}*e^{-0.29}</math> if furosemide</b><br><b><math>Vc=3.79*(WT/11.4)^{1.06}</math>; <math>Q=0.20*(WT/11.4)^{1.25}</math></b><br><b><math>Vp=3.65*(WT/11.4)^{1.06}</math></b>                                                                    | <b>2534</b> | <b>-10</b> |
| Sex on Vc                            | $CL=2.96*(WT/11.4)^{1.29}*e^{0.35}$ if female<br>$Vc=3.15*(WT/11.4)^{1.05}$ ; $Q=0.21*(WT/11.4)^{1.29}$<br>$Vp=3.85*(WT/11.4)^{1.05}$                                                                                                                                         | 2540        | -4         |
| <i>Multivariate Analysis, Step 1</i> |                                                                                                                                                                                                                                                                               |             |            |
| Furosemide and Sex on CL             | <b><math>CL=3.44*(WT/11.4)^{1.21}*e^{-0.2}</math> if furosemide</b><br><b><math>CL=3.44*(WT/11.4)^{1.21}*e^{-0.28}</math> if female</b><br><b><math>Vc=3.76*(WT/11.4)^{1.06}</math></b><br><b><math>Q=0.21*(WT/11.4)^{1.21}</math>; <math>Vp=3.75*(WT/11.4)^{1.06}</math></b> | <b>2529</b> | <b>-5</b>  |
| <i>Backward Elimination, Step 1</i>  |                                                                                                                                                                                                                                                                               |             |            |
| Drop Furosemide on CL                | $CL=2.96*(WT/11.4)^{1.29}*e^{0.35}$ if female<br>$Vc=3.15*(WT/11.4)^{1.05}$ ; $Q=0.21*(WT/11.4)^{1.29}$<br>$Vp=3.85*(WT/11.4)^{1.05}$                                                                                                                                         | 2540        | +11        |
| Drop Sex on CL                       | <b><math>CL=3.15*(WT/11.4)^{1.06}*e^{-0.29}</math> if furosemide</b><br><b><math>Vc=3.79*(WT/11.4)^{1.24}</math>; <math>Q=0.20*(WT/11.4)^{1.02}</math></b><br><b><math>Vp=3.65*(WT/11.4)^{1.24}</math></b>                                                                    | <b>2534</b> | <b>+5</b>  |
| <i>Backward Elimination, Step 2</i>  |                                                                                                                                                                                                                                                                               |             |            |
| Drop Furosemide on CL                | $CL=3.0.6*(WT/11.4)^{1.31}$ ; $Vc=3.94*(WT/11.4)^{1.07}$<br>$Q=0.21*(WT/11.4)^{1.31}$ ; $Vp=3.74*(WT/11.4)^{1.07}$                                                                                                                                                            | 2544        | +10        |
| <i>Final Model</i>                   |                                                                                                                                                                                                                                                                               |             |            |
| Furosemide on CL                     | $CL=3.15*(WT/11.4)^{1.24}*e^{-0.29}$ if furosemide<br>$CL=3.15*(WT/11.4)^{1.24}$ otherwise<br>$Vc=3.79*(WT/11.4)^{1.06}$<br>$Q=0.20*(WT/11.4)^{1.24}$<br>$Vp=3.65*(WT/11.4)^{1.06}$                                                                                           | 2534        | .          |

CL: clearance, OFV: objective function value, Q: intercompartmental clearance, Vc: volume of distribution of the central compartment, Vp: volume of distribution of peripheral compartment

**Figure S2. Prediction-Corrected Visual Predictive Check for Final Tazobactam Model**

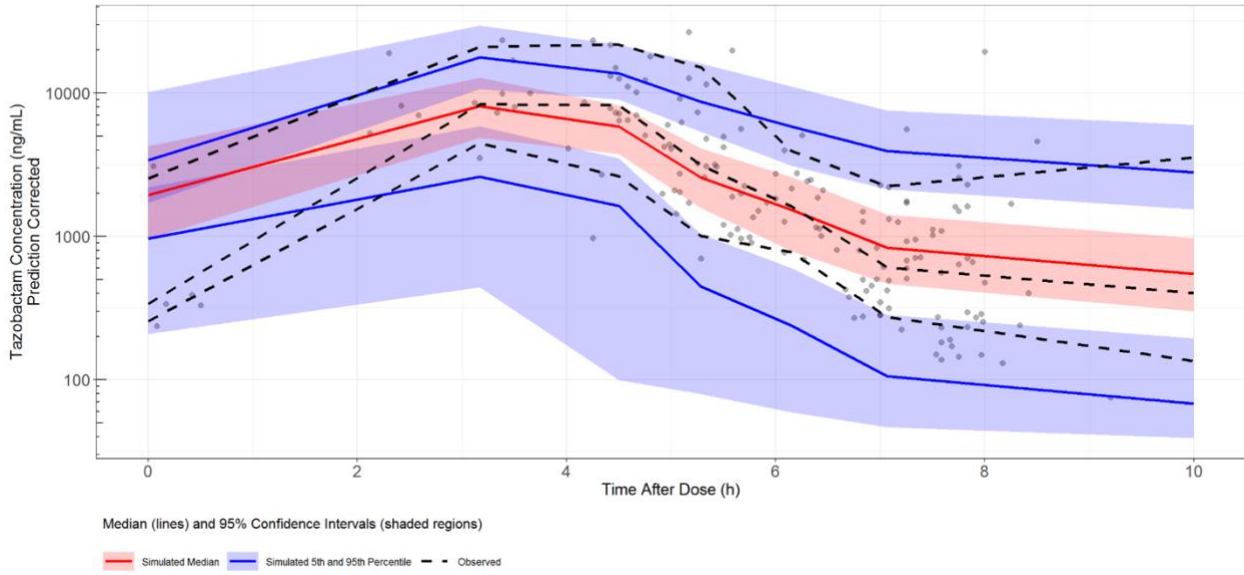

Supplement: AAC.01260-19-s0001.pdf [file AAC.01260-19-s0001.pdf]
